# Supplementary material
Source: HighWire-hosted journal article supplement (https://jama.ama-assn.org/content/suppl/2004/09/10/292.8.998)

# Aumento de peso y diabetes

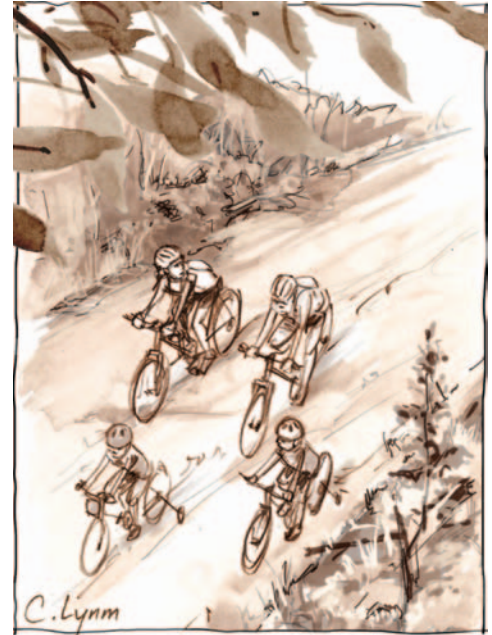

La **diabetes** es una enfermedad frecuente en la que el cuerpo tiene dificultades para controlar la concentración de glucosa (azúcar) en la sangre. En condiciones normales, una hormona producida por el **páncreas** (órgano abdominal), la **insulina**, regula las concentraciones sanguíneas de glucosa. En la diabetes de tipo 1, que suele iniciarse durante los primeros años de la adolescencia, el cuerpo de la persona afectada no fabrica la cantidad suficiente de esta hormona para controlar la glucosa sanguínea, por lo que necesita recibir inyecciones de insulina. En cambio, el cuerpo de una persona con diabetes de tipo 2 es resistente a los efectos de la insulina. La diabetes de tipo 2, también denominada diabetes “de inicio” en el adulto, suele desarrollarse durante la vida adulta pero también pueden presentarla niños con exceso de peso. Una historia familiar de la enfermedad y el exceso de peso, en particular los kilogramos de más ganados en la madurez, son potentes factores de riesgo de desarrollarla. Perder peso disminuye sustancialmente la posibilidad de desarrollar diabetes de tipo 2 y, en las personas ya afectadas, puede contribuir a controlar la glucosa sanguínea. La diabetes de tipo 2 puede tratarse con dieta, ejercicio y mediante la prescripción de medicamentos por vía oral, pero también puede requerir inyecciones de insulina.

El número de JAMA correspondiente al 25 de agosto de 2004 incluye un artículo en el que se describe que las mujeres que aumentan el consumo de refrescos azucarados hasta una o más bebidas al día tienen mayores probabilidades de incrementar su peso, y que un consumo elevado de estas bebidas también se relaciona con un mayor riesgo de desarrollar diabetes de tipo 2.

## PARA PERDER O CONTROLAR SU PESO

- Efectúe ejercicio con regularidad: como mínimo, 30 minutos diarios de caminar a paso ligero, practicar deporte o llevar a cabo juegos que requieran actividad física.
- Siga una dieta saludable, con consumo abundante de verduras, fruta, legumbres y cereales integrales y pocos hidratos de carbono refinados, caso de dulces y pan blanco.
- Limite el consumo de bebidas azucaradas, como refrescos y zumos de fruta (industriales o caseros).
- Evite el consumo de alimentos ricos en grasas, caso de helados, mantequilla y carnes rojas.
- Limite el consumo de alcohol: como máximo 1 (si es mujer), 2 (si es varón) bebidas al día, o **ninguna** si le resulta difícil controlar el alcohol que toma.
- En lugar de hacer 3 comidas copiosas al día, es mejor que aumente el número pero reduciendo el tamaño de las raciones.
- Tome siempre un desayuno equilibrado.
- Si ya presenta exceso de peso, trate de perder como máximo 1 kilogramo a la semana. Una pérdida superior puede perjudicar su salud y, con frecuencia, acabará recuperando esos kilogramos perdidos, ¡y algunos más!
- Pida a su familia y amigos que también participen y animeles a comer de manera saludable y a practicar ejercicio con usted.

Recuerde que su dieta y régimen de ejercicio son cambios del estilo de vida que necesita mantener a largo plazo para no recuperar jamás los kilogramos perdidos.

Fuentes: National Institute of Diabetes and Digestive and Kidney Diseases; American Diabetes Association, y Centers for Disease Control and Prevention.

## PARA MÁS INFORMACIÓN

- American Diabetes Association  
Tel.: 800/DIABETES (800/342-2383).  
[www.diabetes.org](http://www.diabetes.org)
- National Institute of Diabetes and Digestive and Kidney Diseases  
Tel.: 800/860-8747.  
[www.niddk.nih.gov](http://www.niddk.nih.gov)

## PARA SU PROPIA INFORMACIÓN

Para localizar esta “Página de JAMA para el Paciente” u otras previas, acceda al índice de la “Página para el Paciente” en la web de JAMA ([www.jama.com](http://www.jama.com)). Las “Páginas de JAMA para el Paciente” están disponibles en inglés y en español. En el número de JAMA correspondiente al 14 de junio de 2000 se publicó una “Página para el Paciente” acerca de perder peso, en el correspondiente al 26 de septiembre de 2001 sobre diabetes de tipo 2 en niños, en el de fecha 15 de mayo de 2002 acerca del ABC de la diabetes y en el de 22-29 de octubre de 2003 sobre la diabetes de tipo 1.

Redactora: Sharon Parmet, MS

Diseñador: Cassio Lynn, MA

Editor: Richard M. Glass, MD

La “Página de JAMA para el Paciente” es un servicio público de la revista JAMA. La información y recomendaciones que aparecen en esta página son adecuadas en la mayoría de los casos, pero no constituyen el sustituto de un diagnóstico médico. Para una información más específica sobre su caso particular, la revista JAMA le sugiere que consulte con su médico. Los médicos y otros profesionales de asistencia sanitaria pueden reproducir esta página sin fines comerciales y facilitarla a los pacientes. Cualquier otro tipo de reproducción debe someterse a la aprobación de la AMA. Para adquirir separatas, pueden ponerse en contacto con el teléfono +718/946-7424.

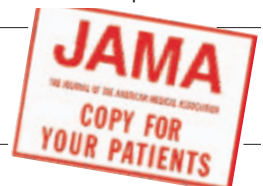

Supplement: pdfpat082504.pdf [file pdfpat082504.pdf]
